# Supplementary material for: Evaluating User Perceptions of Mobile Medication Management Applications With Older Adults: A Usability Study
Source: PubMed Central journal article supplement (PMC4114457; doi:10.2196/mhealth.3048), 2014-03-14
Supplement: mhealth_v2i1e11_app1.pdf [file mhealth_v2i1e11_app1.pdf]

## Multimedia Appendix 1

**Table.** Systems Usability Scale used to compare selected medication management applications.

|    |                                                                                      | Strongly<br>Disagree | Disagree | Neutral | Agree | Strongly<br>Agree |
|----|--------------------------------------------------------------------------------------|----------------------|----------|---------|-------|-------------------|
| 1  | I think that I would like to use [app] frequently.                                   | 1                    | 2        | 3       | 4     | 5                 |
| 2  | I found [app] unnecessarily complex.                                                 | 1                    | 2        | 3       | 4     | 5                 |
| 3  | I thought [app] was easy to use.                                                     | 1                    | 2        | 3       | 4     | 5                 |
| 4  | I think that I would need the support of a technical person to be able to use [app]. | 1                    | 2        | 3       | 4     | 5                 |
| 5  | I found the various functions in [app] were well integrated.                         | 1                    | 2        | 3       | 4     | 5                 |
| 6  | I thought there was too much inconsistency in [app].                                 | 1                    | 2        | 3       | 4     | 5                 |
| 7  | I would imagine that most people would learn to use [app] very quickly.              | 1                    | 2        | 3       | 4     | 5                 |
| 8  | I found [app] very cumbersome to use.                                                | 1                    | 2        | 3       | 4     | 5                 |
| 9  | I felt very confident using [app].                                                   | 1                    | 2        | 3       | 4     | 5                 |
| 10 | I needed to learn a lot of things before I could get going with [app].               | 1                    | 2        | 3       | 4     | 5                 |
